# Supplementary material
Source: Springer Nature journal article supplement (https://www.springermedizin.de/resource/supplementary/12889_2013_6734_MOESM3_ESM.pdf/9498974)

Proper latrine use, cleaning and access

**Latrine misuse**

**Lack of cleaning**

**Lack of maintenance**

**Latrine abandoning**

**Disguised but evolved open defecation (OD)**

**Overt OD** →

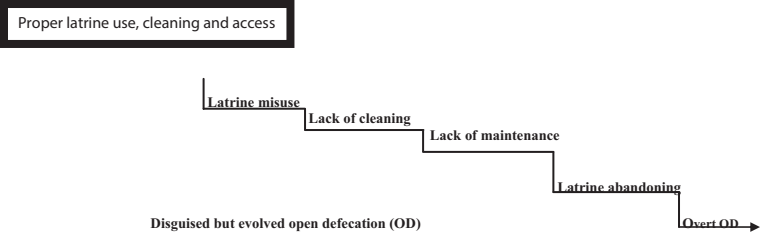

Supplement: MOESM3 [file 9498974]
